# Supplementary material
Source: publisher site journal article supplement (https://www.spandidos-publications.com/6461/downloadSupplementary)

Figure S1. Verification of ZFTA expression in cells transduced with an ZFTA expressing lentivirus. Cultured human endothelial cells (EC) were transduced with either an LV-ZFTA or LV-Mock, followed by RT-qPCR analysis of ZFTA mRNA levels. \*\*\* $P < 0.001$ . ZFTA, zinc finger translocation-associated protein; LV, lentivirus; Mock, LV vector serving as a control; RT-qPCR, reverse transcription-quantitative PCR.

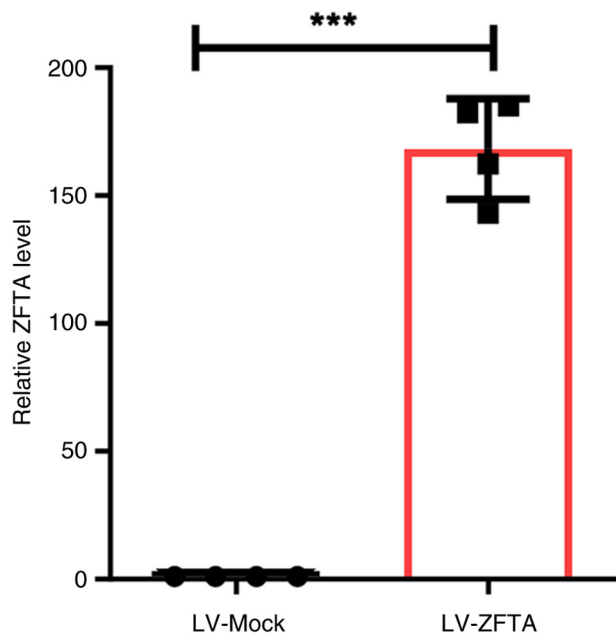

Figure S2. Spearman analysis on data from the TCGA database. Bioinformatics analysis revealed correlations between ZFTA and ACSL4 expression in prostate adenocarcinoma, pancreatic cancer, kidney renal papillary cell carcinoma, bladder cancer, head and neck squamous cell carcinoma and colon adenocarcinoma. TCGA The Cancer Genome Atlas; ZFTA, zinc finger translocation-associated protein; ACSL4, acyl-CoA synthetase long chain family member 4.

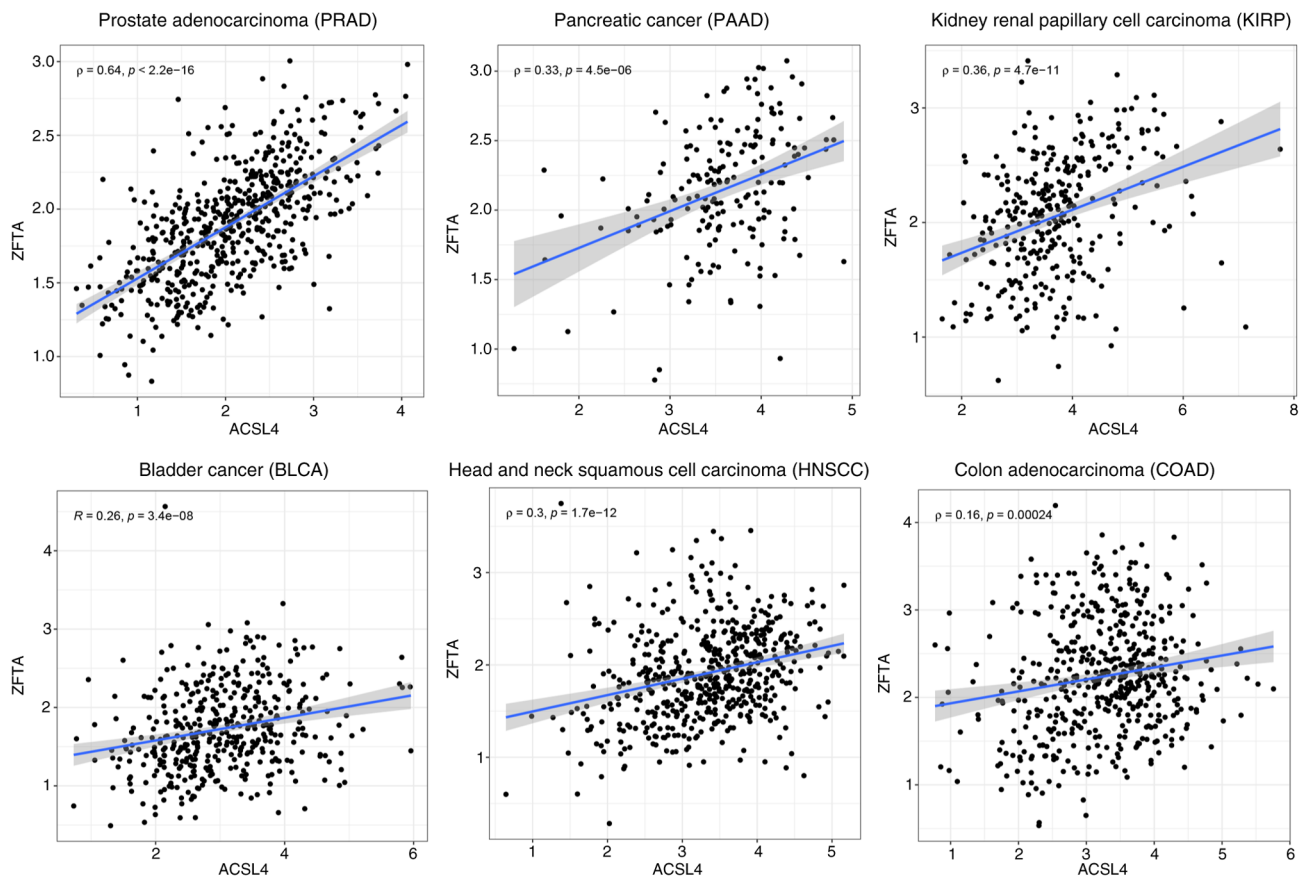

Supplement: Supplementary file 1 [file downloadSupplementary]
